# Supplementary material for: Japanese Encephalitis DNA Vaccines with Epitope Modification Reduce the Induction of Cross-Reactive Antibodies against Dengue Virus and Antibody-Dependent Enhancement of Dengue Virus Infection
Source: MDPI journal article supplement (doi:10.3390/vaccines10091411), 2022-08-28
Supplement: s1 [file s1]

**Table S1.** Primers used in this study.

| Description                                      | Direction | Sequence                                |
|--------------------------------------------------|-----------|-----------------------------------------|
| JEV Nakayama strain prM-E cloning into pcDNA3.1  | Forward   | 5'-CCGGAATTCACCATGGAAGGCTCAATCATGTGG-3' |
|                                                  | Reverse   | 5'-GGCCTCGAGTTAAGCATGCACATTGGTCGC-3'    |
| JEV Beijing-1 strain prM-E cloning into pcDNA3.1 | Forward   | 5'-CCGGAATTCACCATGGAAGGCTCAATCATGTGG-3' |
|                                                  | Reverse   | 5'-GCTACCAATGTGCATGCTTA-ACTCGAGGCC-3'   |
| JEV P3 strain prM-E cloning into pcDNA3.1        | Forward   | 5'-CCGGAATTCACCATGGAAGGCTCAATCATGTGG-3' |
|                                                  | Reverse   | 5'-GCGACCAATGTGCATGCTTA-ACTCGAGGCC-3'   |
| DENV-2 NGC strain prM-E cloning into pcDNA3.1    | Forward   | 5'-CGGGATATCACCATGAACAGGAGACGCAGAACT-3' |
|                                                  | Reverse   | 5'-GGCCTCGAGTTAGGCCTGCACCATAACTCC-3'    |
| Sequence primer designed on CMV promoter         | Forward   | 5'-GGCGTGACGGTGGGAGGTC-3'               |
| JEV prM-E sequence primer 1                      | Forward   | 5'-AGGCATTCCAAGACTAGTAGGAGATCCGTG-3'    |
| JEV prM-E sequence primer 2                      | Forward   | 5'-GGGTCACAGGAAGGAGGC-3'                |
| JEV prM-E sequence primer 3                      | Reverse   | 5'-AGTCGTTGAAAAGGCTTTGCC-3'             |
| DENV-2 prM-E sequence primer 1                   | Forward   | 5'-GCATAGGAATATCAAATAGAG-3'             |
| DENV-2 prM-E sequence primer 2                   | Forward   | 5'-GCTCTCCGAGAACGGGCCTCG-3'             |
| DENV-2 prM-E sequence primer 3                   | Forward   | 5'-AACCTCCATTCTGGAGACAGC-3'             |
| JEV Nakayama G106V introduction                  | Forward   | 5'-GTACTTTTCGGGAAGGGAAGCATTGAC-3'       |
|                                                  | Reverse   | 5'-ACATCCGTTGCCCCACCCACGATCAG-3'        |
| JEV Nakayama L107F introduction                  | Forward   | 5'-GGATTTTCGGGAAGGGAAGCATTGAC-3'        |
|                                                  | Reverse   | 5'-ACATCCGTTGCCCCACCCACGATCAG-3'        |
| JEV Nakayama G106V/L107F introduction            | Forward   | 5'-GTATTTTCGGGAAGGGAAGCATTGAC-3'        |
|                                                  | Reverse   | 5'-ACATCCGTTGCCCCACCCACGATCAG-3'        |
| JEV Beijing-1 G106V introduction                 | Forward   | 5'-GTACTTTTCGGGAAGGGAAGTATTG-3'         |
|                                                  | Reverse   | 5'-GATCGTGGGTGGGGCAACGGATGT-3'          |
| JEV P3 G106V introduction                        | Forward   | 5'-GTACTTTTCGGGAAAGGAAGCATTG-3'         |
|                                                  | Reverse   | 5'-GATCGTGGGTGGGGCAACGGATGT-3'          |
| DENV-2 G106V introduction                        | Forward   | 5'-GTATTATTGAAAAGGAGGCATTGTG-3'         |
|                                                  | Reverse   | 5'-ACATCCATTCCCCATCCTCTGTCC-3'          |

Underline: Restriction enzyme site.

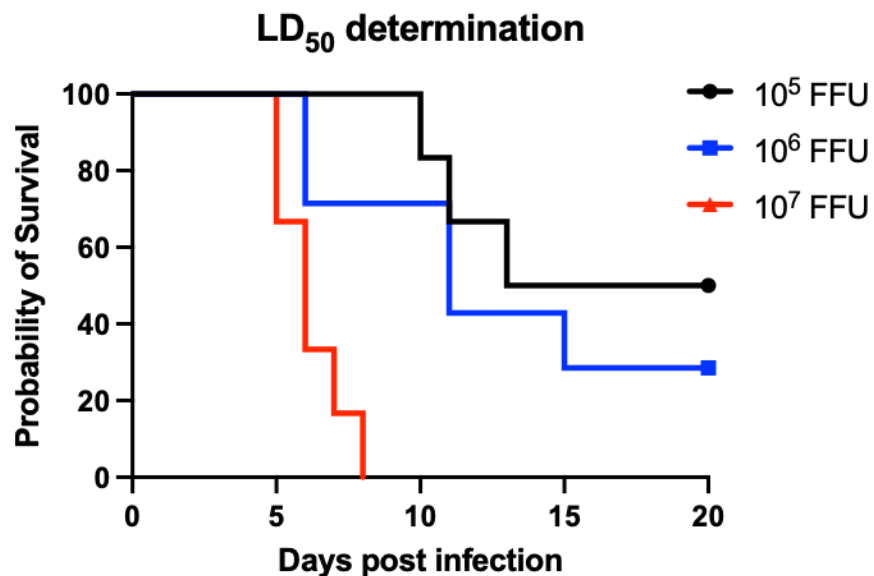

**Figure S1.** Determination of 50% lethal dose. A serially diluted JEV P3 strain was inoculated intraperitoneally into six or seven 6-week-old BALB/c mice to determine the 50% lethal dose (LD<sub>50</sub>). The mice were monitored for 20 days. Mice were humanely euthanized if they showed apparent symptoms or a decrease of >20% in their initial body weight. The estimated LD<sub>50</sub> was  $1.4 \times 10^5$  focus forming unit (FFU).
